# Supplementary material for: Benzenthiolate bridged binuclear group 12 metal complexes with TTF fused dithiolate ligand, a new synthetic approach using cluster-cracking reactionElectronic supplementary information (ESI) available: synthesis and characterization of the complexes. Fig. S1: 1H NMR spectrum of 2. Fig. S2: ES-MS of 1. Fig. S3: PM3 calculated charges. See http://www.rsc.org/suppdata/cc/b2/b202698h/
Source: Royal Society of Chemistry journal article supplement (doi:10.1039/b202698h), 2002-06-10
Supplement: b202698h.doc [file b202698h.doc]

**Supplementary Material (ESI) for Chemical Communications**

**This journal is © The Royal Society of Chemistry 2002**

**Synthesis and characterization of the complexes**

**(Me4N)2[Cd2(SPh)2(S2TTF(SMe)2)2]** (**1**). After de-protecting the ligand [(SMe)2TTF(SCH2CH2CN)2] (48 mg, 0.1 mmol) in 5 mL THF using Me4NOH, a redish-brown salt (Me4N)2[S2TTF(SMe)2]] precipitated. The salt was dissolved in methanol (4 mL) and was added to (Me4N)2[Cd4(Sph)10] (42 mg, 0.025 mmol). The mixture was stirred for 1 h under argon and an orange precipitate formed. It was filtered off, washed with MeOH and finally dried in *vacuo* (yield 56%). The product was sealed in a glass tube under argon atmosphere to avoid oxidation. Anal. data for C36H46N2S18Cd2: C, 33.08; H, 3.52; N, 2.14. Found: C, 33.47; H, 3.91; N, 2.61%. 1H NMR (acetone-d6): 2.40 (s, 12H), 3.42 (s, 24H), 7.31 (tri, 2H), 7.38 (tri, 4H), 7.55 (d, 4H).

**(Me4N)2[Zn2(SPh)2(S2TTF(SMe)2)2]** (**2**). Following the above procedure, the ligand (48 mg, 0.1 mmol) was de-protected in THF and reacted with (Me4N)2[Zn4(Sph)10] (38 mg, 0.025 mmol) in MeOH. Then the binuclear complex **2** precipitated. It was filtered off, washed with MeOH and finally dried in *vacuo* (yield 54%). Anal. data for C36H46N2S18Zn2: C, 35.64; H, 3.80; N, 2.31%. Found: C, 35.74; H, 4.19; N, 2.54%. 1H NMR (acetone-d6): 2.40(s, 12H), 3.42(s, 24H), 7.30(tri, 2H), 7.38(tri, 4H), 7.53(d, 4H).

**[Cd(S2TTF(SMe)2)2]** (**3**). It isan oxidation product of the complex **1**. To an acetonitrile (7 mL) solution of **1** (20mg, 0.015mmol) was added with stirring an acetonitrile (5 mL) solution of I2 (15mg, 0.06 mmol) under argon to afford immediately dark brown insoluble solid of **3**. It was filtered off, washed with acetonitrile and finally dried in *vacuo* (yield 81%). Anal. data for C16H12S16Cd: C, 23.19; H, 1.45%. Found: C, 22.82; H, 1.46%.

**[Zn(S2TTF(SMe)2)2]** (**4**). It is an oxidation product of the complex **2**. Complex **2** was oxidized in the same method as that of **1**, to afford immediately dark brown insoluble solid of **4**. It was filtered off, washed with acetonitrile and finally dried in *vacuo* (yield 78%). Anal. data for C16H12S16Zn: C, 24.58; H, 1.54%. Found: C, 24.68; H, 1.77%.

**Sup-Fig. 1 1H NMR spectrum of the complex 2**

**
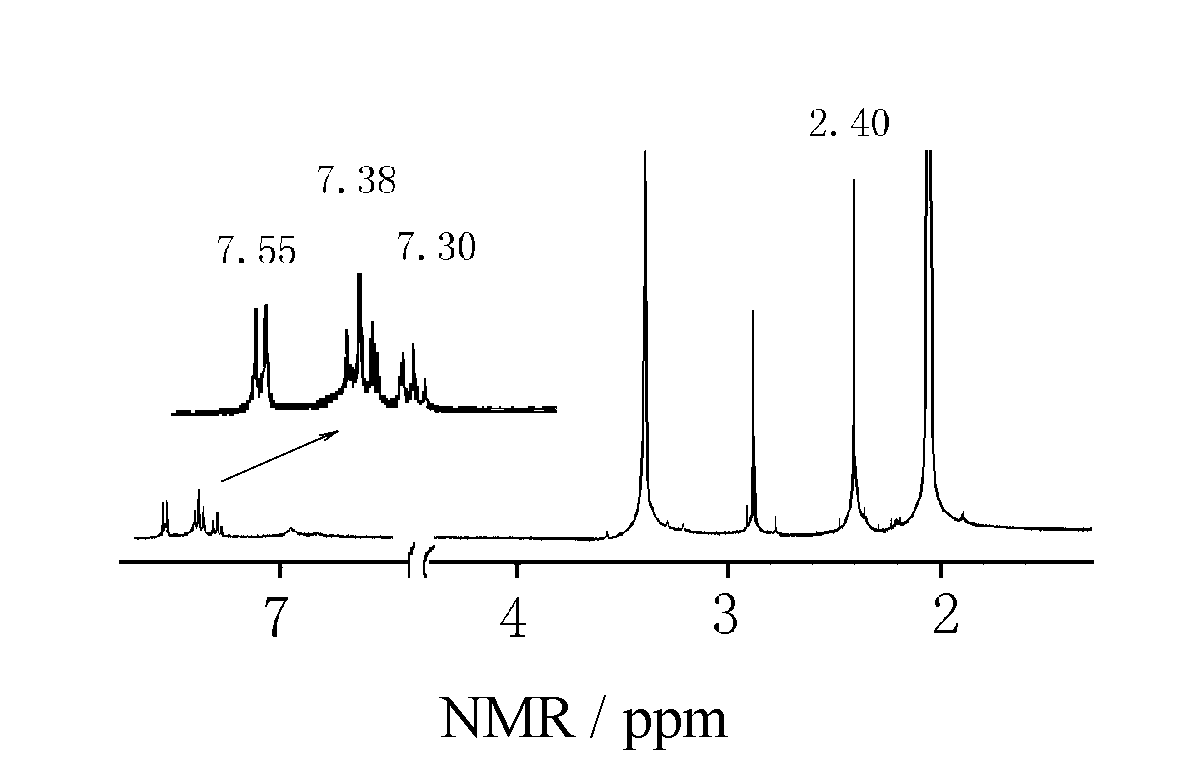
**

**Sup-Fig. 2 Electrospray mass spectrum of the complex 1**

**
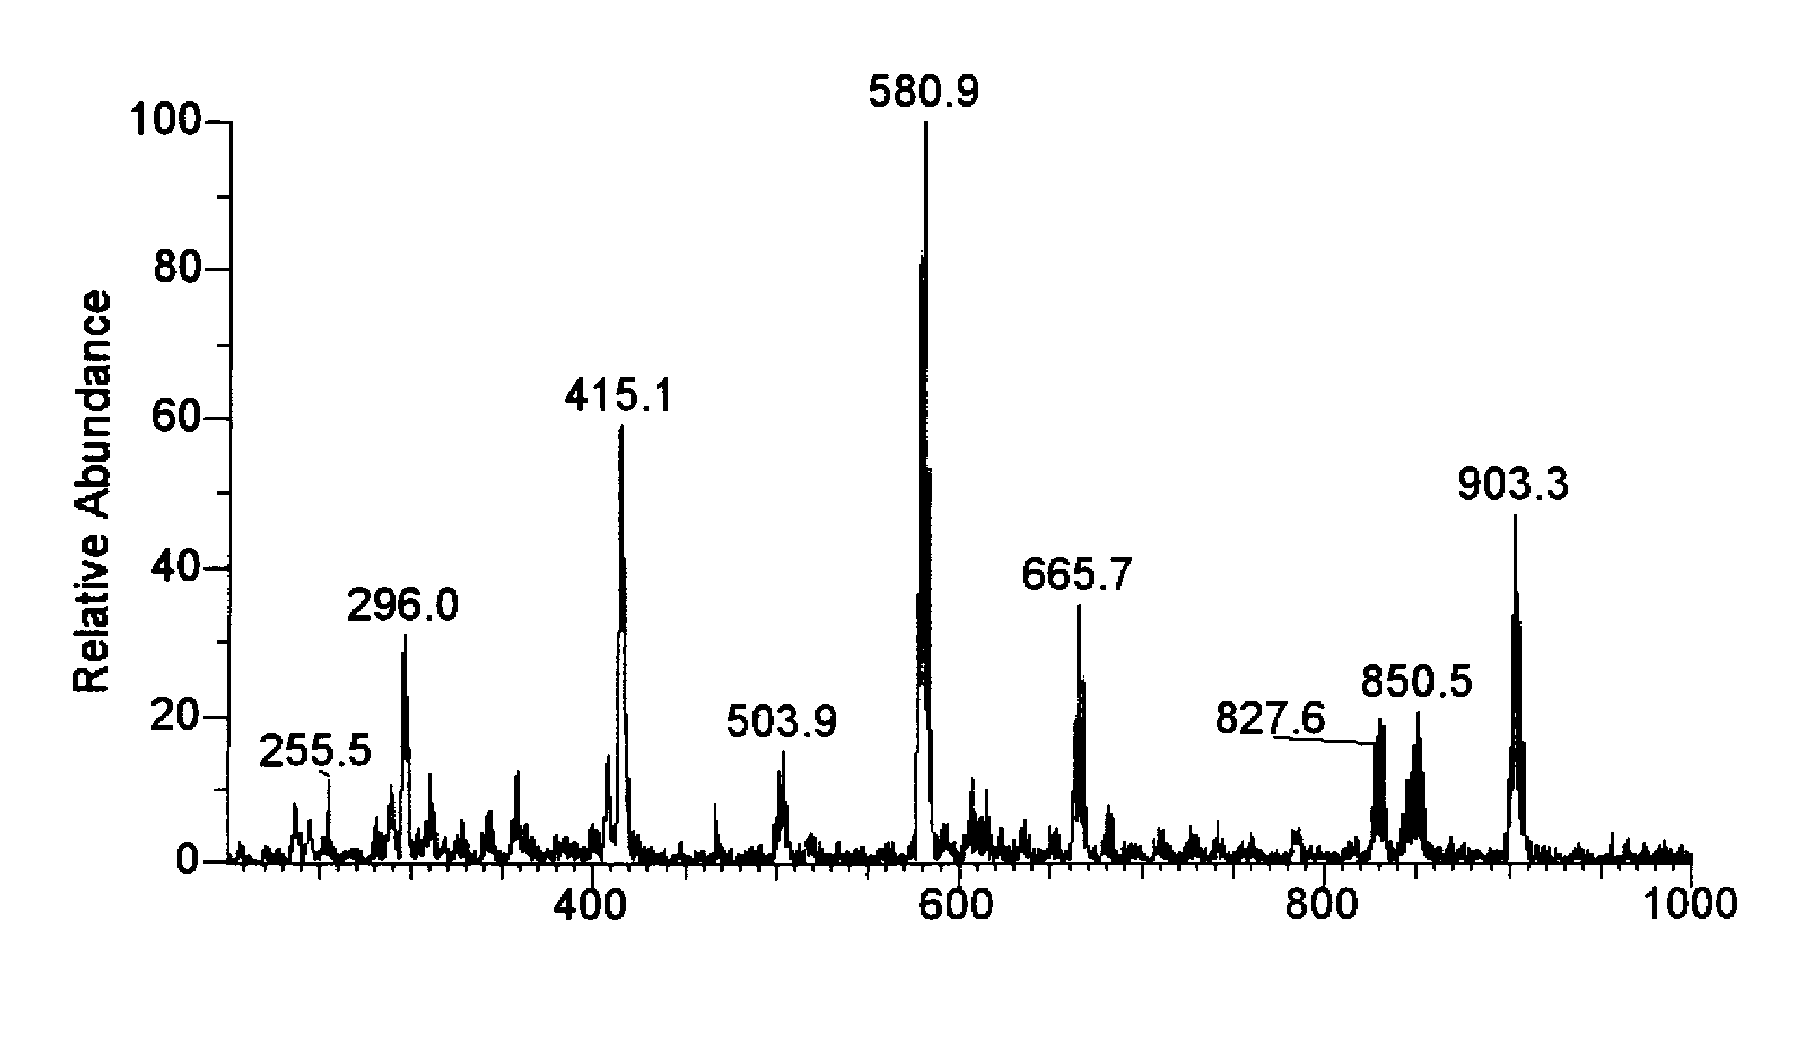
**

**Sup-Fig. 3**  **PM3 Calculated charges on the sulfur atoms of the relevant ligands**

(a) [SPh]- (b) [dmit]2- (c) [S2TTF(RS)2]2-
